# Supplementary material
Source: Elsevier journal article supplement (https://rcastoragev2.blob.core.windows.net/b47b9fe739684fd44f98521630c4b6c6/mmc1.pdf)
Supplement: mmc1 [file mmc1.pdf]

# THE LANCET

## **Supplementary appendix**

This appendix formed part of the original submission and has been peer reviewed.  
We post it as supplied by the authors.

Supplement to: Beard DJ, Davies LJ, Cook JA, et al. The clinical and cost-effectiveness of total versus partial knee replacement in patients with medial compartment osteoarthritis (TOPKAT): 5-year outcomes of a randomised controlled trial. *Lancet* 2019; published online July 17. [http://dx.doi.org/10.1016/S0140-6736\(19\)31281-4](http://dx.doi.org/10.1016/S0140-6736(19)31281-4).

## Supplementary Tables:

The clinical and cost effectiveness of total versus partial knee replacement in patients with medial compartment osteoarthritis (TOPKAT): 5-year outcomes of a randomised trial

**Table S1:** Response categories for anchor type questions

|                                                                                                                                                                                                                                                                                                                                                                                          |
|------------------------------------------------------------------------------------------------------------------------------------------------------------------------------------------------------------------------------------------------------------------------------------------------------------------------------------------------------------------------------------------|
| <p><b>1) How satisfied are you with your knee?</b><br/>(Dissatisfied, Uncertain, Satisfied, Very satisfied).<br/><i>This was analysed as a binary outcome of Satisfied/Very satisfied versus Dissatisfied/Uncertain.</i></p>                                                                                                                                                             |
| <p><b>2) How are the problems related to your knee now, compared with before your knee surgery?</b><br/>(No problems at all now; Much better; Slightly better; No change; Slightly worse; Much worse).<br/><i>This was analysed as a binary outcome of; Better (No problems at all now; Much better; Slightly better) versus Not Better (No change; Slightly worse; Much worse).</i></p> |
| <p><b>3) If you could go back in time, would you still choose to have the knee operation?</b><br/>(Yes, No, Not sure).<br/><i>This was analysed as a binary outcome; Yes (Yes) versus No/Unsure (No, Not sure).</i></p>                                                                                                                                                                  |

**Table S2:** Treatment received and implants used in the TOPKAT study. For wider comparison with implant usage in the UK [NJR data] please refer to Beard DJ et al. Health Technology Assessment (in press).

|                                             | PKR N=264    | TKR N=264    |
|---------------------------------------------|--------------|--------------|
| Received surgery                            |              |              |
| Yes                                         | 263 (99.6)   | 251 (95.1)   |
| No                                          | 1 (0.4)      | 13 (4.9)     |
| Received allocated knee replacement surgery |              |              |
| Yes                                         | 232 (88.2)   | 238 (94.8)   |
| No                                          | 31 (11.8)    | 13 (5.2)     |
|                                             | <b>n=263</b> | <b>n=251</b> |
| Surgical technique (and implant used)       |              |              |
| PKR                                         | 232 (88.2)   | 13 (5.2)     |
| Oxford                                      | 150 (64.7)   | 7 (53.8)     |
| Zimmer                                      | 36 (15.5)    | 4 (30.8)     |
| MG                                          | 22 (9.5)     | 1 (7.7)      |
| Corin uniglide                              | 9 (3.9)      | -            |
| AMC                                         | 5 (2.2)      | -            |
| Du Puy                                      | 4 (1.7)      | -            |
| Mathys                                      | 4 (1.7)      | -            |
| Medacta                                     | 1 (0.4)      | -            |
| Sigma                                       | 1 (0.4)      | -            |
| Vanguard                                    | -            | 1 (7.7)      |
| TKR                                         | 31 (11.8)    | 238 (94.8)   |
| LCS                                         | 10 (32.3)    | 61 (25.6)    |
| PFC/Sigma                                   | 3 (9.7)      | 54 (22.7)    |
| Vanguard                                    | 3 (9.7)      | 41 (17.2)    |
| NexGen                                      | 8 (25.8)     | 29 (12.2)    |
| Triathlon                                   | 4 (12.9)     | 27 (11.3)    |
| Genesis                                     | 2 (6.5)      | 7 (2.9)      |
| Scorpio/Kinemax                             | 1 (3.2)      | 7 (2.9)      |
| ACS                                         | -            | 6 (2.5)      |
| EUROS                                       | -            | 2 (0.8)      |
| AGC                                         | -            | 1 (0.4)      |
| AllPoly                                     | -            | 1 (0.4)      |
| Oxinium xlpe poly                           | -            | 1 (0.4)      |
| Unknown                                     | -            | 1 (0.4)      |
| Values are numbers (%)                      |              |              |

**Table S3: Operation details**

|                                | PKR N=264      | TKR N=264       |
|--------------------------------|----------------|-----------------|
| <b>Received surgery</b>        | <b>N=263</b>   | <b>N=251</b>    |
| ASA grade- n (%)               |                |                 |
| I                              | 46 (17.5)      | 39 (15.5)       |
| II                             | 192 (73.0)     | 188 (74.9)      |
| III                            | 17 (6.5)       | 17 (6.8)        |
| Missing                        | 8 (3.0)        | 7 (2.8)         |
| Ease of replacement- n (%)     |                |                 |
| Straightforward                | 245 (93.2)     | 236 (94.0)      |
| Difficult                      | 16 (6.1)       | 14 (5.6)        |
| Missing                        | 2 (0.8)        | 1 (0.4)         |
| Patella replaced- n (%)        |                |                 |
| Yes                            | 2 (0.8)        | 20 (8.0)        |
| No                             | 258 (98.1)     | 229 (91.2)      |
| Missing                        | 3 (1.1)        | 2 (0.8)         |
| Bearing- n (%)                 |                |                 |
| Mobile                         | 165 (62.7)     | 84 (33.5)       |
| Fixed                          | 96 (36.5)      | 161 (64.1)      |
| Missing                        | 2 (0.8)        | 6 (2.4)         |
| Size of bearing – mean (SD); n | 6.3 (2.9); 250 | 10.0 (1.7); 235 |
| Cement- n (%)                  |                |                 |
| Palacos                        | 145 (55.1)     | 137 (54.6)      |
| CMW I                          | 11 (4.2)       | 18 (7.2)        |
| Optipac                        | 13 (4.9)       | 11 (4.4)        |
| Smart ser                      | 15 (5.7)       | 7 (2.8)         |
| Simplex                        | 1 (0.4)        | 2 (0.8)         |
| None                           | 77 (29.3)      | 74 (29.5)       |
| Missing                        | 1 (0.4)        | 2 (0.8)         |
| X-ray performed- n (%)         |                |                 |
| Yes                            | 2 (0.8)        | 1 (0.4)         |
| No                             | 253 (96.2)     | 240 (95.6)      |
| Missing                        | 8 (3.0)        | 10 (4.0)        |
| Type of anaesthetic- n (%)     |                |                 |
| Spinal                         | 201 (76.4)     | 198 (78.9)      |
| Periarticular LA               | 125 (47.5)     | 92 (36.7)       |
| Femoral block                  | 68 (25.9)      | 104 (41.4)      |
| GA                             | 61 (23.2)      | 66 (26.3)       |
| Sciatic block                  | 15 (5.7)       | 12 (4.8)        |
| Epidural                       | 7 (2.7)        | -               |

**Table S4:** Complications by treatment received

|                                            | PKR N=264    | TKR N=264           |
|--------------------------------------------|--------------|---------------------|
| <b>Treatment received</b>                  | <b>n=245</b> | <b>n=269</b>        |
| Number of participants with a complication | 48 (19.6)    | 73 (27.1)           |
|                                            | RR 0.72      | 95% CI (0.53, 0.98) |
| Total number of complications              | 76           | 114                 |
| <b>Details of complications</b>            |              |                     |
| Related to primary operation               |              |                     |
| Number of participants (and complications) | 1 (0.4)      | 2 (0.7)             |
| Blood transfusion                          | -            | 2                   |
| Medical reasons                            | 1            | -                   |
| Post-operative                             |              |                     |
| Number of participants (and complications) | 10 (4.1)     | 19 (7.1)            |
| Blood transfusion                          | -            | 6                   |
| Respiratory problems                       | 3            | 3                   |
| Renal and urological problems              | 2            | 3                   |
| Miscellaneous                              | 2            | 3                   |
| Treated DVT or PE                          | 2            | 1                   |
| Cardiac problems                           | -            | 2                   |
| Treated DVT or PE/Cardiac problems         | -            | 1                   |
| Anaesthetic problems                       | 1            | -                   |
| <b>Required readmission</b>                |              |                     |
| Required medical treatment only            |              |                     |
| Number of participants (and complications) | 3 (1.2)      | 9 (3.3)             |
| Unexplained pain                           | 1            | 3                   |
| Bearing dislocation                        | 1            | -                   |
| Wound breakdown                            | -            | 2                   |
| Bronchopneumonia                           | -            | 1                   |
| Cardiac problems                           | -            | 1                   |
| Cellulitis                                 | -            | 1                   |
| Treated DVT or PE                          | -            | 1                   |
| Superficial infection                      | 1            | -                   |
| Values are number of events (%)            |              |                     |

**Table S4:** Complications by treatment received (continued)

|                                                    | PKR N=264 | TKR N=264 |
|----------------------------------------------------|-----------|-----------|
| Treatment received                                 | n=245     | n=269     |
| Required surgery                                   |           |           |
| Number of participants                             | 15 (6.1)  | 21 (7.8)  |
| Number of complications                            | 25        | 28        |
| Unexplained pain                                   | 9         | 8         |
| Knee stiffness                                     | -         | 10        |
| Bearing dislocation                                | 4         | -         |
| Device loosening (Tibia)                           | 2         | -         |
| Infection                                          | 1         | 1         |
| Ligamentous instability                            | 1         | 1         |
| Pain from trauma                                   | 1         | -         |
| Periprosthetic Fracture                            | 1         | -         |
| Unexplained pain and knee stiffness                | 1         | 6         |
| Mechanical failure and infection                   | -         | 1         |
| Unexplained pain and swelling                      | 1         | -         |
| Unexplained pain and skin complication             | 1         | -         |
| Unexplained pain and bearing dislocation           | 1         | -         |
| Device loosening (Tibia)and renal/urological       | 1         | -         |
| Problems                                           |           |           |
| Bearing dislocation and renal/urological problems  | 1         | -         |
| Unknown                                            | -         | 1         |
| Readmission further surgery intra-operative        |           |           |
| Number of participants (and complications)         | -         | 1         |
| Medical reasons                                    | -         | 1         |
| Readmission further surgery post-operative         |           |           |
| Number of participants                             | 3 (1.2)   | -         |
| Number of events                                   | 4         | -         |
| Blood transfusion                                  | 1         | -         |
| Renal and urological problems                      | 1         | -         |
| Skin complications                                 | 1         | -         |
| Bearing dislocation, renal/urological problems and | 1         | -         |
| blood transfusion                                  |           |           |
| Values are number of events (%)                    |           |           |

**Table S4:** Complications by treatment received (continued)

|                                    | PKR N=264 | TKR N=264 |
|------------------------------------|-----------|-----------|
| Treatment received                 | n=245     | n=269     |
| <b>Did not require readmission</b> |           |           |
| 2-month follow-up                  |           |           |
| Number of participants             | 5 (2.0)   | 15 (5.6)  |
| Number of events                   | 5         | 18        |
| Wound infection                    | 3         | 6         |
| Unexplained pain                   | 1         | 2         |
| Wound breakdown                    | -         | 3         |
| Swelling                           | -         | 3         |
| Miscellaneous                      | -         | 2         |
| Knee stiffness                     | -         | 2         |
| Skin complication                  | 1         | -         |
| 1-year follow-up                   |           |           |
| Number of participants             | 13 (5.3)  | 18 (6.7)  |
| Number of events                   | 15        | 21        |
| Unexplained pain                   | 8         | 12        |
| Knee stiffness                     | 1         | 5         |
| Swelling                           | 3         | 1         |
| Instability                        | 1         | 1         |
| Wound infection                    | 1         | -         |
| Periosthetic fracture              | -         | 1         |
| Miscellaneous                      | 1         | -         |
| Skin complication                  | -         | 1         |
| 5-years follow-up                  |           |           |
| Number of events                   | 13        | 16        |
| Number of participants             | 12 (4.9)  | 16 (5.9)  |
| Unexplained pain                   | 10        | 10        |
| Knee stiffness                     | 1         | 1         |
| Medical reasons                    | -         | 2         |
| Miscellaneous                      | 1         | 1         |
| Wound infection                    | -         | 1         |
| Wound infection                    | -         | 1         |
| Ligamentous instability            | 1         | -         |
| Values are number of events (%)    |           |           |

**Table S5.** Response level data for EQ-5D questionnaires at each follow-up time, by treatment allocation

|                           | Baseline |     | 2 months |     | 1 year |     | 2 years |     | 3 years |     | 4 years |     | 5 years |     |
|---------------------------|----------|-----|----------|-----|--------|-----|---------|-----|---------|-----|---------|-----|---------|-----|
|                           | PKR      | TKR | PKR      | TKR | PKR    | TKR | PKR     | TKR | PKR     | TKR | PKR     | TKR | PKR     | TKR |
| <b>Mobility</b>           |          |     |          |     |        |     |         |     |         |     |         |     |         |     |
| No problems               | 7%       | 9%  | 44%      | 36% | 54%    | 48% | 59%     | 50% | 48%     | 48% | 46%     | 48% | 51%     | 47% |
| Some problems             | 91%      | 87% | 47%      | 53% | 37%    | 41% | 30%     | 42% | 34%     | 37% | 33%     | 36% | 37%     | 37% |
| Extreme problems          | 0%       | 0%  | 0%       | 0%  | 0%     | 0%  | 0%      | 0%  | 0%      | 0%  | 0%      | 0%  | 0%      | 0%  |
| Missing                   | 3%       | 5%  | 10%      | 11% | 9%     | 11% | 11%     | 8%  | 18%     | 14% | 21%     | 16% | 13%     | 16% |
| <b>Self-care</b>          |          |     |          |     |        |     |         |     |         |     |         |     |         |     |
| No problems               | 65%      | 66% | 76%      | 74% | 80%    | 72% | 77%     | 75% | 71%     | 68% | 67%     | 66% | 73%     | 66% |
| Some problems             | 33%      | 29% | 14%      | 16% | 11%    | 17% | 12%     | 17% | 11%     | 18% | 12%     | 18% | 14%     | 18% |
| Extreme problems          | 0%       | 1%  | 0%       | 0%  | 0%     | 0%  | 0%      | 0%  | 0%      | 0%  | 0%      | 0%  | 1%      | 0%  |
| Missing                   | 3%       | 5%  | 10%      | 11% | 9%     | 11% | 11%     | 8%  | 18%     | 14% | 21%     | 16% | 13%     | 16% |
| <b>Usual activities</b>   |          |     |          |     |        |     |         |     |         |     |         |     |         |     |
| No problems               | 14%      | 11% | 35%      | 30% | 51%    | 45% | 56%     | 48% | 48%     | 47% | 49%     | 45% | 51%     | 47% |
| Some problems             | 76%      | 77% | 49%      | 54% | 38%    | 41% | 31%     | 39% | 32%     | 37% | 27%     | 35% | 33%     | 32% |
| Extreme problems          | 8%       | 7%  | 6%       | 5%  | 2%     | 3%  | 2%      | 5%  | 3%      | 2%  | 3%      | 4%  | 4%      | 4%  |
| Missing                   | 3%       | 5%  | 10%      | 11% | 9%     | 11% | 11%     | 8%  | 18%     | 14% | 21%     | 16% | 13%     | 16% |
| <b>Pain</b>               |          |     |          |     |        |     |         |     |         |     |         |     |         |     |
| No problems               | 1%       | 1%  | 19%      | 13% | 36%    | 30% | 41%     | 36% | 35%     | 35% | 36%     | 35% | 42%     | 38% |
| Some problems             | 62%      | 51% | 67%      | 72% | 51%    | 53% | 44%     | 48% | 43%     | 44% | 40%     | 42% | 39%     | 37% |
| Extreme problems          | 35%      | 43% | 5%       | 5%  | 3%     | 5%  | 5%      | 7%  | 4%      | 7%  | 3%      | 7%  | 7%      | 9%  |
| Missing                   | 3%       | 5%  | 10%      | 11% | 9%     | 11% | 11%     | 8%  | 18%     | 14% | 21%     | 16% | 13%     | 16% |
| <b>Anxiety/depression</b> |          |     |          |     |        |     |         |     |         |     |         |     |         |     |
| No problems               | 60%      | 56% | 69%      | 63% | 72%    | 69% | 71%     | 67% | 68%     | 66% | 63%     | 65% | 67%     | 64% |
| Some problems             | 33%      | 34% | 19%      | 24% | 17%    | 18% | 15%     | 23% | 13%     | 16% | 15%     | 16% | 17%     | 17% |
| Extreme problems          | 4%       | 6%  | 3%       | 2%  | 2%     | 2%  | 3%      | 2%  | 1%      | 4%  | 2%      | 4%  | 3%      | 3%  |
| Missing                   | 3%       | 5%  | 10%      | 11% | 9%     | 11% | 11%     | 8%  | 18%     | 14% | 21%     | 16% | 13%     | 16% |



**Table S6.** Missing data on healthcare resource use and EQ-5D utility by treatment allocation in each follow-up period

| Follow-up time | Healthcare resource use |             | EQ-5D utility |             |
|----------------|-------------------------|-------------|---------------|-------------|
|                | PKR                     | TKR         | PKR           | TKR         |
| Baseline       | 6 (2.3%)                | 7 (2.7%)    | 7 (2.7%)      | 12 (4.5%)   |
| 2 months       | 20 (7.6%)               | 28 (10.6%)  | 26 (9.8%)     | 29 (11%)    |
| 1 year         | 24 (9.1%)               | 27 (10.3%)  | 24 (9.1%)     | 29 (11.1%)  |
| 2 years        | 31 (11.8%)              | 29 (11.2%)  | 29 (11%)      | 20 (7.8%)   |
| 3 years        | 47 (18.0%)              | 36 (14%)    | 47 (18%)      | 37 (14.4%)  |
| 4 years        | 57 (22%)                | 44 (17.3%)  | 54 (20.8%)    | 41 (16.1%)  |
| 5 years        | 34 (13.2%)              | 43 (17.0%)  | 33 (12.8%)    | 41 (16.2%)  |
| Average        | 219 (12.0%)             | 214 (11.8%) | 220 (12.0%)   | 209 (11.5%) |

Values are number of missing questionnaires (percentage missing)

**Table S7:** Index surgery costs by treatment allocation

|                       | PKR          | TKR            | Difference (PKR v TKR),<br>mean (95% CI) |
|-----------------------|--------------|----------------|------------------------------------------|
| Total admission costs | £3,991 (889) | £4,463 (1,709) | -£470 (-729, -211)                       |
| Implant device        | £915 (199)   | £1,205 (340)   | -£292 (-408, -176)                       |
| Time in theatre       | £1,932 (479) | £1,820 (639)   | £112 (18, 207)                           |
| Hospital stay         | £1,101 (536) | £1,358 (1,212) | -£256 (-463, -50)                        |
| Complications         | £44 (278)    | £79 (382)      | -£35 (-91, 21)                           |

Values are mean (standard deviation) in UK 2017 prices unless stated otherwise. CI = confidence interval; PKR = Partial Knee Replacement; TKR = Total Knee Replacement.

**Table S8.** Life years, quality-adjusted life years, healthcare costs, and cost-effectiveness for the base-case analysis at 5 years following multiple imputation

|                   | PKR           | TKR           | Difference (PKR v TKR),<br>mean (95% CI) |
|-------------------|---------------|---------------|------------------------------------------|
| N                 | 264           | 264           | -                                        |
| Life-years        | 4.917 (0.709) | 4.831 (0.888) | 0.085 (-0.032, 0.202)                    |
| QALYs             | 3.448 (0.970) | 3.193 (1.060) | 0.240 (0.046, 0.434)                     |
| Total costs (£)   | £5,149 (56)   | £6,048 (60)   | -£910 (-1,503, -317)                     |
| Initial admission | £3,991 (30)   | £4,463 (41)   | -£471 (-729, -214)                       |
| Follow-up         | £1,158 (54)   | £1,585 (55)   | -£433 (-979, 114)                        |
| ICER              | -             | -             | -£3,792                                  |

SD = standard deviation; CI = confidence interval; PKR = Partial Knee Replacement; TKR = Total Knee Replacement; QALY = Quality-Adjusted Life Year; ICER = Incremental Cost Effectiveness Ratio.

**Table S9:** Impact of surgeon experience or clustering by surgeon on OKS at 5 years

| Model                                           | Treatment difference in OKS (95% CI) | Learning effect (95% CI) | Learning by treatment interaction (95% CI) |
|-------------------------------------------------|--------------------------------------|--------------------------|--------------------------------------------|
| Standard OKS model                              | 1.04 (-0.42, 2.50)                   |                          |                                            |
| Model extended to adjust for surgeon experience | 1.84 (0.02, 3.65)                    | 0.0001 (-0.0003, 0.0005) | -0.0032 (-0.0054, -0.0010)                 |

**Table S10:** Deaths

|                                 | PKR N=264 | TKR N=264 |
|---------------------------------|-----------|-----------|
| Number of deaths                | 6 (2.3)   | 11 (4.2)  |
| Reason for death                |           |           |
| Cancer                          | 4         | 6         |
| Suicide                         | -         | 1         |
| Sepsis                          | -         | 1         |
| Multi organ failure/sepsis      | -         | 1         |
| Unknown                         | 2         | 2         |
| Values are number of events (%) |           |           |

**Figure S12:** Kernel density plot for OKS at baseline and 5-year follow-up for treatment group.

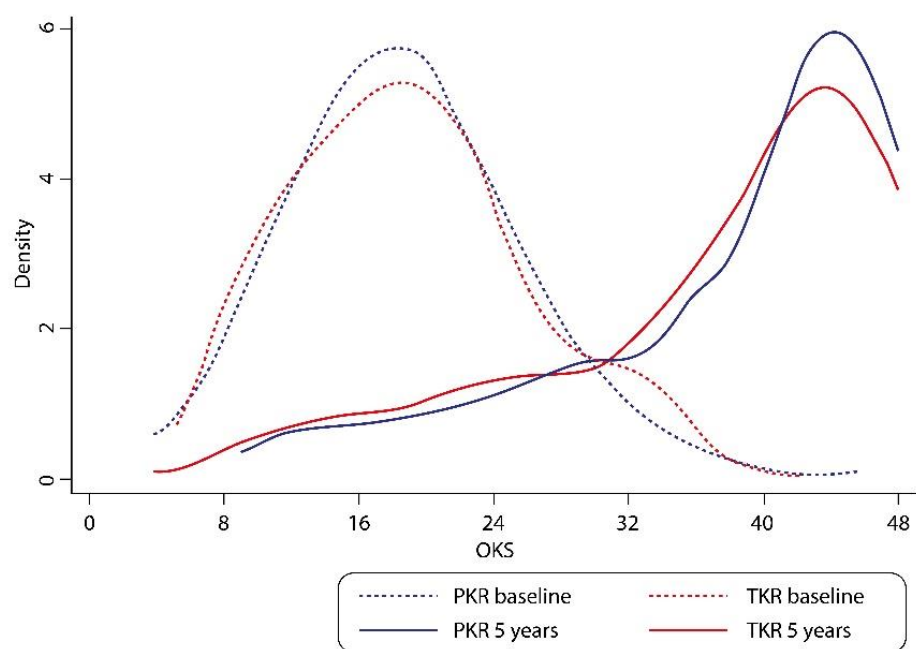

**Figure S13:** Summary plots to compare expertise versus equipoise randomisation (surgeon groups) and other subgroup analysis (age, gender and baseline OKS) in primary outcome OKS for PKR versus TKR 5-years post-randomisation

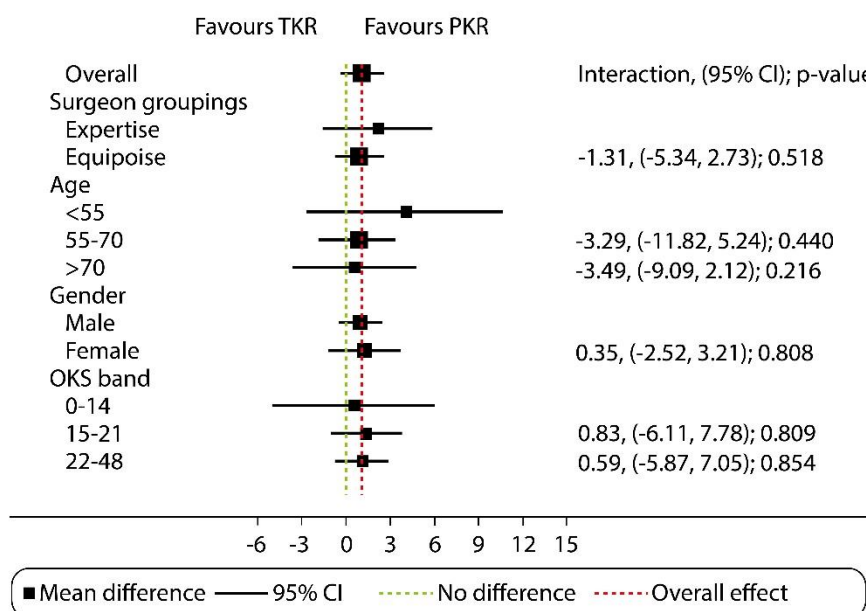

**Figure S14:** Operation time for both groups.

|                                                | PKR N=264                | TKR N=264                |
|------------------------------------------------|--------------------------|--------------------------|
| Received surgery                               | N=262                    | N=250                    |
| Operation time (minutes) – median [IQR]; n     | 68.0 [55.0, 80.0]; 261   | 65.0 [55.0, 80.0]; 249   |
| Theatre time (minutes) – median [IQR]; n       | 113.0 [95.0, 129.0]; 260 | 110.0 [90.0, 128.0]; 249 |
| IQR Interquartile range; SD standard deviation |                          |                          |
